# Supplementary material
Source: publisher figshare collection journal article supplement (https://acs.figshare.com/ndownloader/files/3783502)
Supplement: Supplementary file 1 [file 3783502]

# Supporting Information

## Interfacial Polymerization of Dopamine in a Pickering Emulsion: Synthesis of Cross-Linkable Colloidosomes and Enzyme Immobilization at Oil/Water Interfaces

Yanning Qu,<sup>†</sup> Renliang Huang,<sup>\*,‡</sup> Wei Qi,<sup>\*,†,§,#</sup> Rongxin Su,<sup>†,§,#</sup> and Zhimin He<sup>†</sup>

<sup>†</sup> State Key Laboratory of Chemical Engineering, School of Chemical Engineering and Technology, Tianjin University, Tianjin 300072, P. R. China

<sup>‡</sup> Tianjin Engineering Center of Biomass-derived Gas/Oil Technology, School of Environmental Science and Engineering, Tianjin University, Tianjin 300072, P. R. China

<sup>§</sup> Collaborative Innovation Center of Chemical Science and Engineering (Tianjin), Tianjin 300072, P. R. China

<sup>#</sup> Tianjin Key Laboratory of Membrane Science and Desalination Technology, Tianjin University, Tianjin 300072, P. R. China

\*E-mail: tjuhrl@tju.edu.cn (R. H.); qiwei@tju.edu.cn (W. Q.). Tel: +86 22 27407799

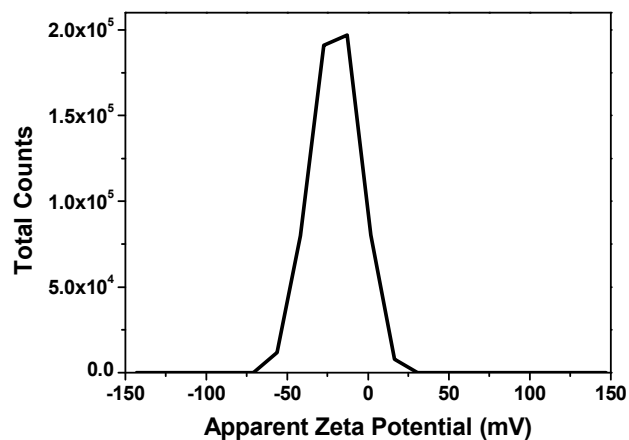

**Figure S1.** Zeta potential of the hydrophobic silica NPs. The zeta potential of the hydrophobic silica NPs is -20.2 mV.

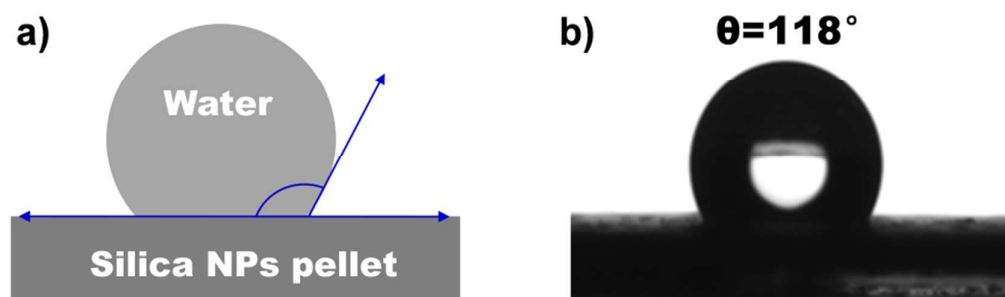

**Figure S2.** a) Scheme of the contact angle on the flake of  $\text{SiO}_2$  NPs pellet. b) Photographs of a  $2\mu\text{L}$  water droplet, resting on the surface of thin slice of the hydrophobic silica NPs.

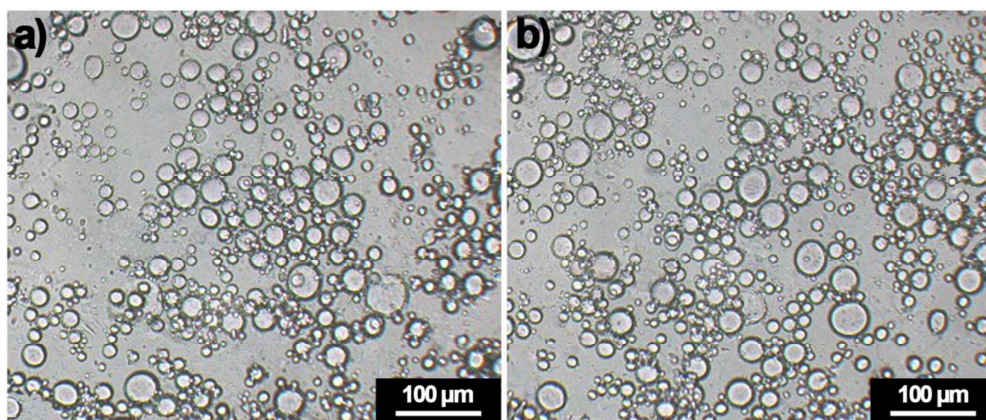

**Figure S3.** a) Optical micrograph of SiNDs in water/heptane media. b) Optical micrograph of SiN/PDACs in water/heptane media.

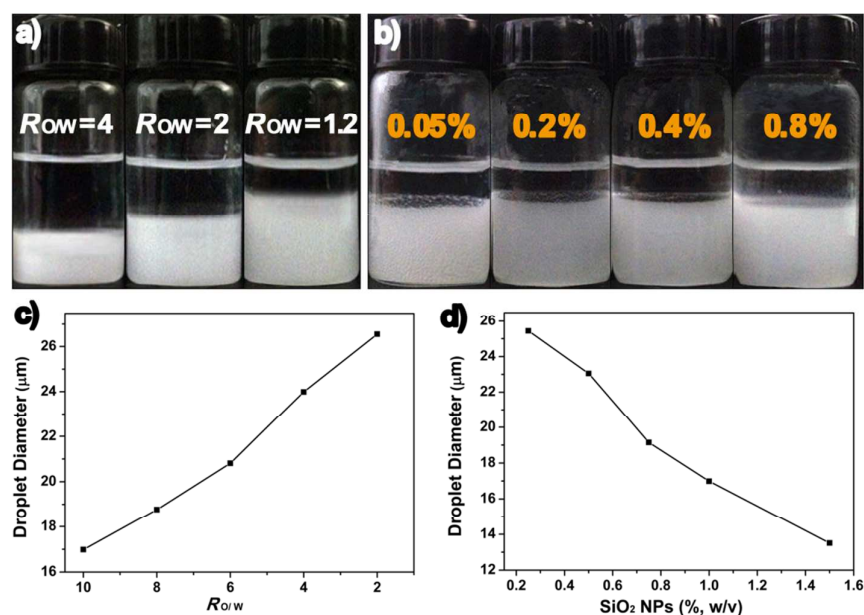

**Figure S4.** a) Photographs of silica-stabilized droplets (SiNDs) formed at different  $R_{o/w}$  values. b) Photographs of SiNDs at different SiO<sub>2</sub> NPs loadings. c) The change in the average diameters of emulsion droplets at different  $R_{o/w}$  values. The SiO<sub>2</sub> NPs loading was held constant at 1% (w/v). d) The change in the average diameters of emulsion droplets at different SiO<sub>2</sub> NPs loadings. The  $R_{o/w}$  value was held constant at 10.

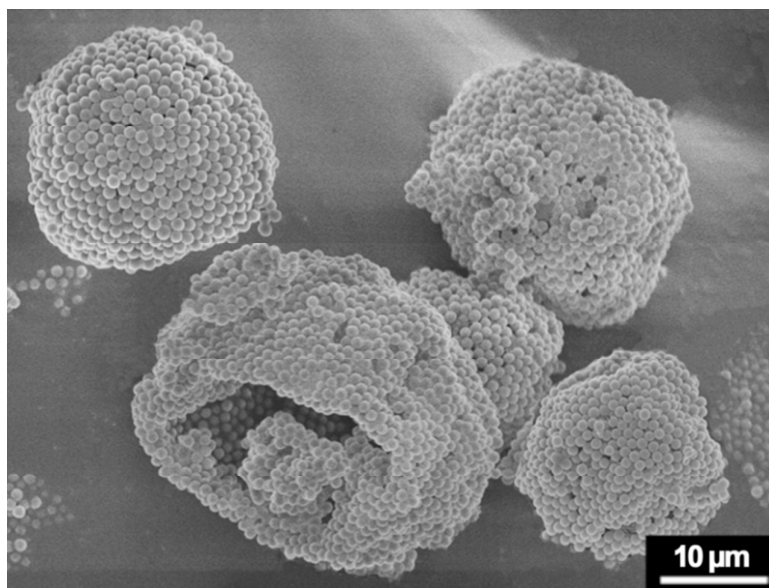

**Figure S5.** SEM images of the SiN/PDACs with 2 mg dopamine mL<sup>-1</sup> Tris-buffer and  $R_{o/w}=6$ .

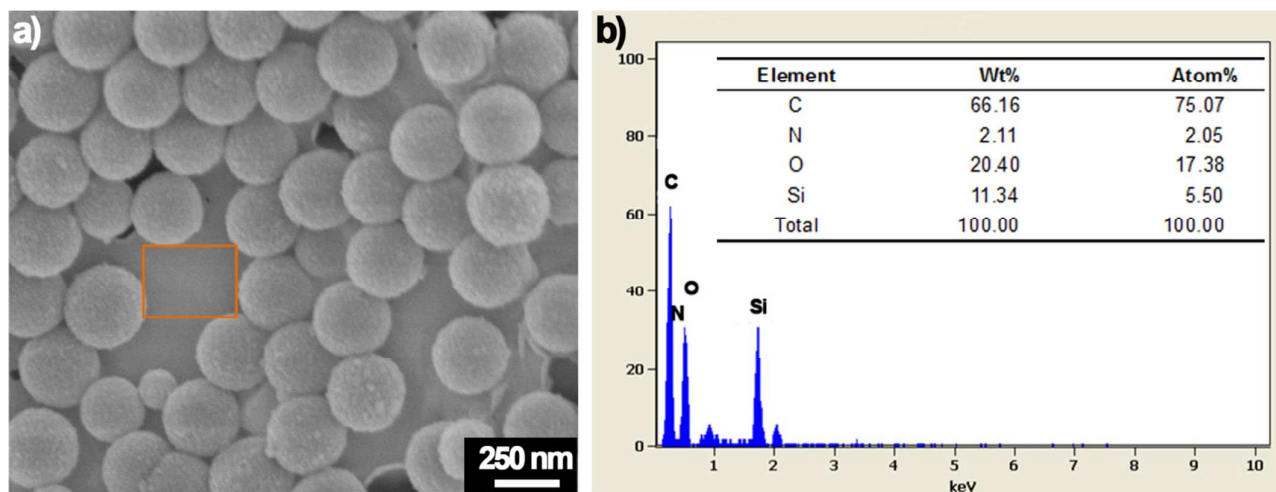

**Figure S6.** EDS analysis of the PDA layer localized on the shell of SiN/PDACs. a) SEM image of the scanning area on the surface of the colloidosome. b) The EDS spectrum of PDA layer showing the elements distribution.

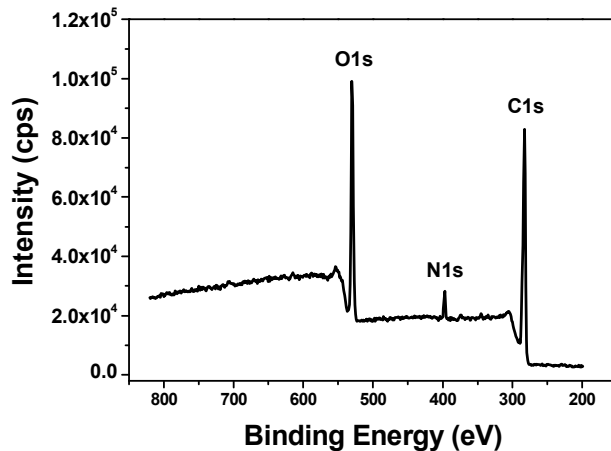

**Figure S7.** XPS survey spectra of the detached SiO<sub>2</sub> NPs, which were collected from SiN/PDACs after repeated high-speed centrifugation, ultrasonic and cleaning treatment with water and ethanol for multiple cycles.

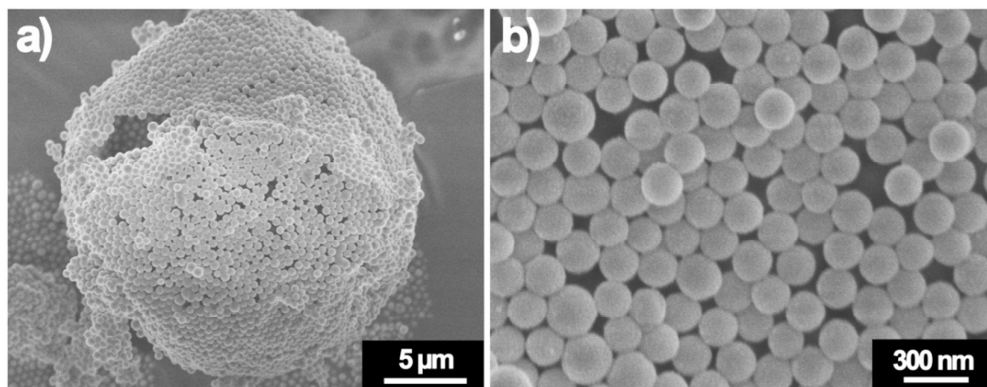

**Figure S8.** a) SEM image of the SiNDs and b) its outer surface formed with no addition of dopamine at  $R_{o/w}=6$  and 1% (w/v) SiO<sub>2</sub> NPs loading.

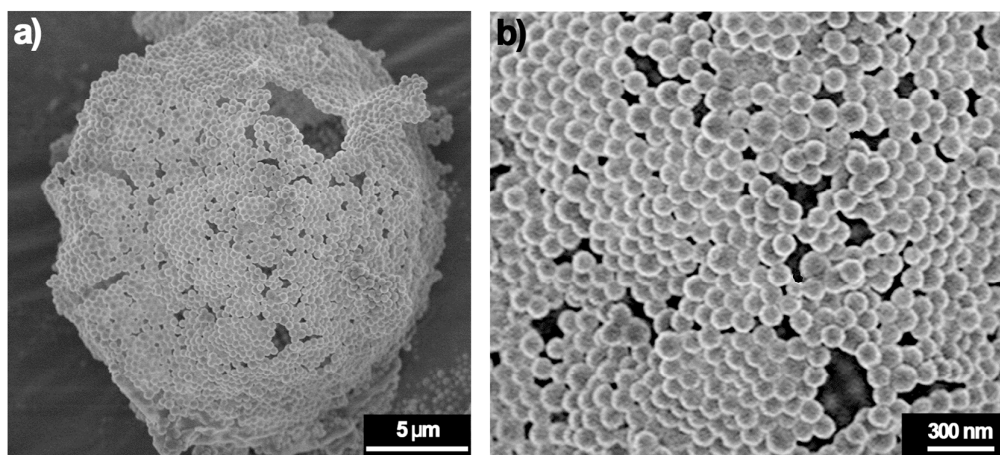

**Figure S9.** a) SEM image of the colloidosomes (denoted as SiN/PDAiCs) and b) its outer surface formed by directly emulsifying an aqueous solution of dopamine with heptane at  $R_{o/w}=6$ , 5 mg dopamine  $\text{mL}^{-1}$  Tris-buffer, 1% (w/v)  $\text{SiO}_2$  NPs loading.

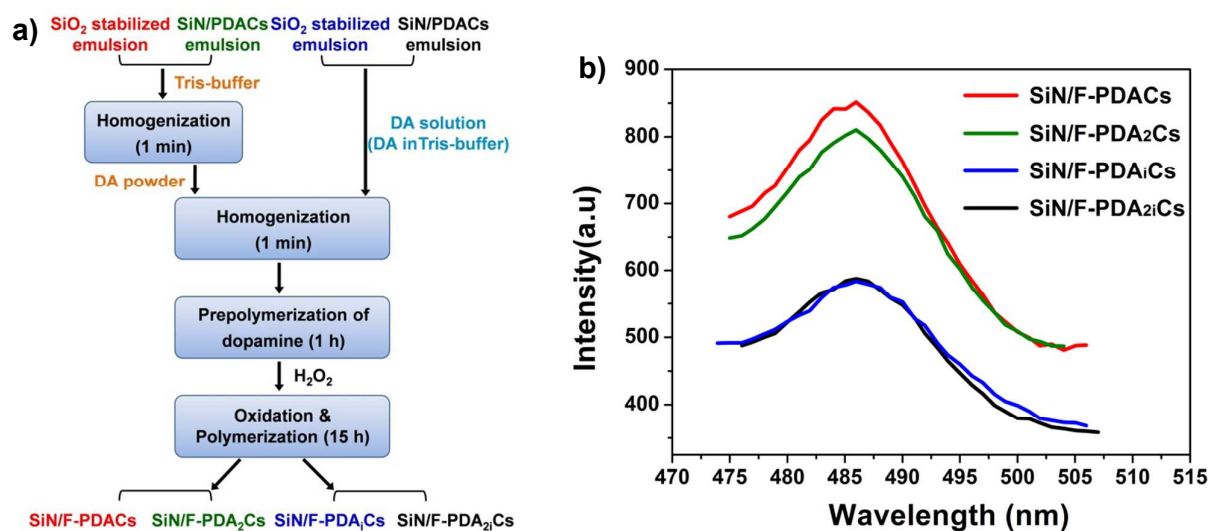

**Figure S10.** a) The fluorescent labeling of PDA via the polymerization of dopamine in the presence of  $\text{H}_2\text{O}_2$ . In these cases, the  $R_{o/w}$  of the initial emulsion was held constant as 10, while the final  $R_{o/w}$  of fluorescent emulsion was held constant as 5.3. b) Fluorescence emission spectra of the fluorescent colloidosomes prepared at different operational reaction conditions as described in Figure S10a.

**Fluorescence analysis:** The fluorescently labeled SiN/F-PDACs were prepared following the procedure as shown in Figure 10a. Briefly, dopamine powder was added to the SiO<sub>2</sub> stabilized Pickering emulsion for 1 h pre-polymerization. Then, an aqueous H<sub>2</sub>O<sub>2</sub> solution was added, homogenized and allowed to react for another 15 h at 20 °C, forming the fluorescently labeled colloidosomes. The SiN/F-PDACs were then characterized by fluorescence spectroscopy. As shown in Figure S10b, the emulsion of SiN/F-PDACs exhibits bright blue luminescence with a maximum emission wavelength of ca. 486 nm under excitation at 405 nm. This fluorescence property is consistent with previously reported results, indicative of the formation of F-PDA.

When the aqueous solution of dopamine was used, the fluorescent colloidosomes, denoted as SiN/F-PDAiCs, were also prepared following a similar procedure to that mentioned above (Figure S10a). Excitation of a suspension of SiN/F-PDAiCs at 405 nm also leads to a fluorescence emission at ca. 486 nm but shows a significant decrease in fluorescence intensity (Figure S10b), which can be attributed the polymerization of dopamine in the aqueous core (the inner of the colloidosomes) rather than at oil/water interfaces. In addition, the SiN/PDACs were also used as templates to synthesize fluorescent PDA by adding dopamine powder or aqueous dopamine solution (Figure S10a). As expected, a higher fluorescence intensity was observed in the case of SiN/F-PDA<sub>2</sub>Cs due to the interfacial polymerization of dopamine and thus more fluorescent molecules incorporated into the colloidosome shell (Figure S10b). Compared to the SiN/F-PDACs, the SiN/F-PDA<sub>2</sub>Cs have a slightly lower fluorescence intensity, possibly attributed to the existing PDA layer speeding up the polymerization of dopamine and thus lead to fewer fluorescent molecules. In this study, we also found that no fluorescence was observed when the SiN/PDACs were treated with H<sub>2</sub>O<sub>2</sub> alone (no dopamine added).



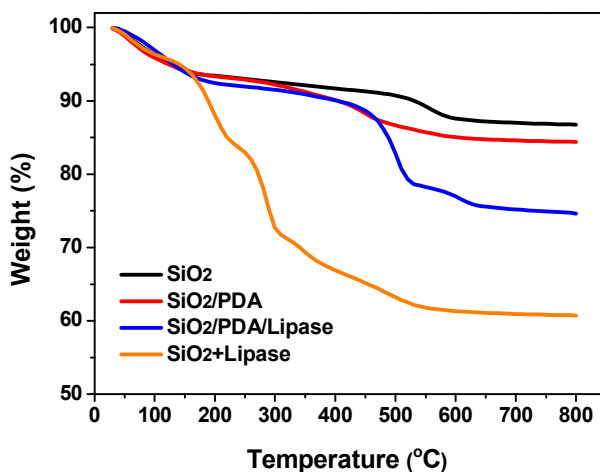

**Figure S11.** Thermogravimetric data of the mixture of SiO<sub>2</sub> NPs and lipase (SiO<sub>2</sub>+Lipase), the detached SiO<sub>2</sub> NPs, SiO<sub>2</sub> NPs coated with PDA (SiO<sub>2</sub>/PDA ), SiO<sub>2</sub> NPs coated with PDA and immobilized lipase (SiO<sub>2</sub>/PDA/Lipase ), which were collected from SiNDs, SiN/PDACs and lipase-SiN/PDACs after repeated high-speed centrifugation, ultrasonic and cleaning treatment with water and ethanol for multiple cycles.

As shown in Figure S11, for the mixture of silica and lipases, the mass loss from 250 to 300 °C should be attributed to the degradation of lipases. For the SiO<sub>2</sub>/PDA/Lipases, the degradation of PDA and lipase was observed from 300 to 500 °C. In this case, the physical and chemical protection derived from SiN/PDACs likely contribute to a higher degradation temperature for lipase. Additionally, the mass loss started from 500 °C was due to the degradation of hydrophobic siloxane groups connected on SiO<sub>2</sub> NPs.



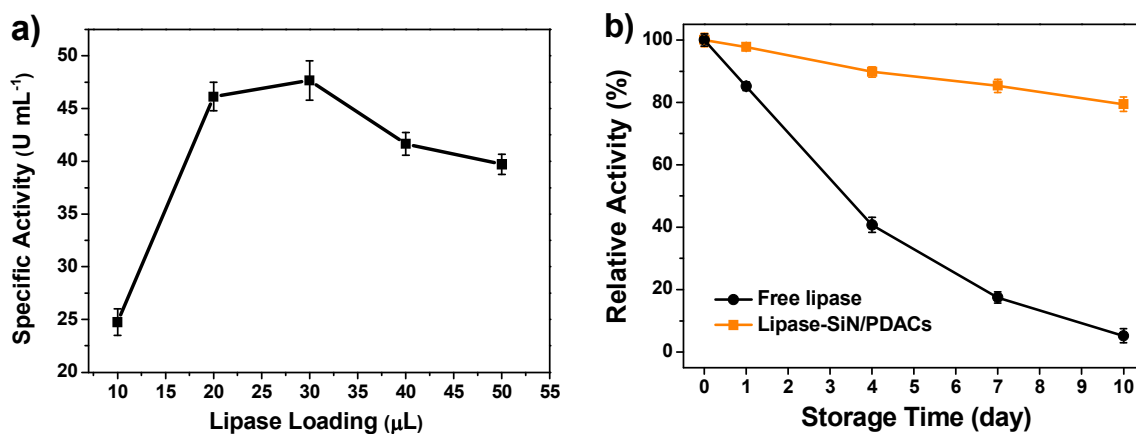

**Figure S12.** a) The effect of lipase loading on the specific activity of the lipase-SiN/PDACs. b) The change in specific activity of the free lipase and lipase-SiN/PDACs during the storage at 4 °C. Relative activity (%) represents the ratio of the residual activity to the initial activity of each sample measured at 37 °C for 1 h.
